# Supplementary material for: Interesting proton behaviour in molecular structures. Variable temperature neutron diffraction and ab initio study of acetylsalicylic acid: characterising librational motions and comparing protons in different hydrogen bonding potentialsElectronic supplementary information (ESI) available: bond lengths and angles from the refinements, refined atomic coordinates and ADPs. See http://www.rsc.org/suppdata/nj/b2/b203775k/
Source: Royal Society of Chemistry journal article supplement (doi:10.1039/b203775k), 2002-11-11
Supplement: b203775k.doc [file b203775k.doc]

**SUPPLEMENTARY MATERIAL FOR**

**Hydrogen atoms in acetylsalicylic acid (Aspirin): the librating methyl group and possible changes in the potential well in the hydrogen bonded dimer.**

**by Chick C Wilson**

**ISIS Facility, Rutherford Appleton Laboratory, Chilton, Didcot Oxon OX11 0QX, UK**

**Submitted to New Journal of Chemistry**

**Structural information at seven temperatures (20, 60, 100, 140, 180, 220, 300K) from neutron single crystal diffraction**

**Supplementary Table 1**

**Variable temperature single crystal neutron diffraction study of Acetylsalicylic acid (Aspirin)**

**Fractional atomic coordinates**

20K

| Atom | X/a | Y/b | Z/c | Ueq (Å2) |
| --- | --- | --- | --- | --- |
| C1 | 0.1538(2) | 0.5585(3) | 0.0667(2) | 0.0039(3) |
| C2 | 0.2480(2) | 0.4795(3) | 0.0073(2) | 0.0037(3) |
| C3 | 0.3007(2) | 0.2933(3) | 0.0405(2) | 0.0049(3) |
| C4 | 0.2612(2) | 0.1826(4) | 0.1346(2) | 0.0056(3) |
| C5 | 0.1682(2) | 0.2586(4) | 0.1953(2) | 0.0055(3) |
| C6 | 0.1150(2) | 0.4439(3) | 0.1611(2) | 0.0039(3) |
| C7 | 0.08996(19) | 0.7546(3) | 0.03734(19) | 0.0032(3) |
| C8 | 0.3676(2) | 0.7369(3) | -0.06279(19) | 0.0041(3) |
| C9 | 0.3999(2) | 0.8408(4) | -0.1737(2) | 0.0071(3) |
| O1 | 0.1242(2) | 0.8575(4) | -0.0532(3) | 0.0053(3) |
| O2 | 0.0100(3) | 0.8130(4) | 0.0956(2) | 0.0062(4) |
| O3 | 0.2892(2) | 0.5796(4) | -0.0893(2) | 0.0035(3) |
| O4 | 0.4042(3) | 0.7807(4) | 0.0386(2) | 0.0065(4) |
| H1 | 0.3737(6) | 0.2358(11) | -0.0087(7) | 0.0207(11) |
| H2 | 0.3032(7) | 0.0374(9) | 0.1603(7) | 0.0211(12) |
| H3 | 0.1377(6) | 0.1739(10) | 0.2708(6) | 0.0173(10) |
| H4 | 0.0415(6) | 0.5036(10) | 0.2073(7) | 0.0186(10) |
| H5 | 0.4624(9) | 0.9660(14) | -0.1477(9) | 0.0297(17) |
| H6 | 0.3187(9) | 0.8974(19) | -0.2249(9) | 0.038(2) |
| H7 | 0.4388(12) | 0.7328(14) | -0.2330(10) | 0.040(2) |
| H8 | 0.0722(6) | 0.9846(9) | -0.0667(6) | 0.0150(9) |

60K

| Atom | X/a | Y/b | Z/c | Ueq (Å2) |
| --- | --- | --- | --- | --- |
| C1 | 0.1540(2) | 0.5590(4) | 0.0667(2) | 0.0058(4) |
| C2 | 0.2478(2) | 0.4799(4) | 0.0074(2) | 0.0055(4) |
| C3 | 0.3006(3) | 0.2939(4) | 0.0403(3) | 0.0084(4) |
| C4 | 0.2610(3) | 0.1832(4) | 0.1345(3) | 0.0091(4) |
| C5 | 0.1683(3) | 0.2590(4) | 0.1957(3) | 0.0085(4) |
| C6 | 0.1152(2) | 0.4448(4) | 0.1609(3) | 0.0067(4) |
| C7 | 0.0898(2) | 0.7545(4) | 0.0372(2) | 0.0059(4) |
| C8 | 0.3674(2) | 0.7369(4) | -0.0632(2) | 0.0068(4) |
| C9 | 0.3994(3) | 0.8406(5) | -0.1737(3) | 0.0104(5) |
| O1 | 0.1239(3) | 0.8578(5) | -0.0532(3) | 0.0082(5) |
| O2 | 0.0100(3) | 0.8129(5) | 0.0957(3) | 0.0092(5) |
| O3 | 0.2892(3) | 0.5804(5) | -0.0896(3) | 0.0066(4) |
| O4 | 0.4043(3) | 0.7811(5) | 0.0381(3) | 0.0107(5) |
| H1 | 0.3724(7) | 0.2394(12) | -0.0090(8) | 0.0255(15) |
| H2 | 0.3027(8) | 0.0389(10) | 0.1618(8) | 0.0255(15) |
| H3 | 0.1377(7) | 0.1749(12) | 0.2703(7) | 0.0226(13) |
| H4 | 0.0419(7) | 0.5040(11) | 0.2078(7) | 0.0207(12) |
| H5 | 0.4619(10) | 0.9645(16) | -0.1481(9) | 0.034(2) |
| H6 | 0.3180(10) | 0.895(2) | -0.2246(12) | 0.050(3) |
| H7 | 0.4390(14) | 0.7325(17) | -0.2315(11) | 0.047(3) |
| H8 | 0.0728(7) | 0.9854(10) | -0.0668(7) | 0.0185(11) |

100K

| Atom | X/a | Y/b | Z/c | Ueq (Å2) |
| --- | --- | --- | --- | --- |
| C1 | 0.15366(19) | 0.5596(3) | 0.06676(19) | 0.0092(3) |
| C2 | 0.24765(18) | 0.4815(3) | 0.00743(19) | 0.0097(3) |
| C3 | 0.3003(2) | 0.2959(3) | 0.0404(2) | 0.0125(3) |
| C4 | 0.2612(2) | 0.1855(4) | 0.1348(2) | 0.0142(4) |
| C5 | 0.1683(2) | 0.2607(3) | 0.1953(2) | 0.0126(3) |
| C6 | 0.11529(19) | 0.4451(3) | 0.16083(19) | 0.0106(3) |
| C7 | 0.09010(18) | 0.7554(3) | 0.03766(18) | 0.0091(3) |
| C8 | 0.36716(19) | 0.7373(3) | -0.06324(19) | 0.0105(3) |
| C9 | 0.3991(2) | 0.8411(4) | -0.1736(2) | 0.0170(4) |
| O1 | 0.1232(2) | 0.8581(4) | -0.0533(3) | 0.0137(4) |
| O2 | 0.0101(3) | 0.8133(4) | 0.0956(2) | 0.0146(4) |
| O3 | 0.2888(2) | 0.5818(4) | -0.0894(2) | 0.0106(3) |
| O4 | 0.4044(3) | 0.7810(5) | 0.0377(2) | 0.0172(5) |
| H1 | 0.3721(6) | 0.2399(10) | -0.0081(6) | 0.0300(12) |
| H2 | 0.3025(7) | 0.0414(9) | 0.1597(7) | 0.0314(13) |
| H3 | 0.1385(6) | 0.1765(10) | 0.2707(6) | 0.0291(11) |
| H4 | 0.0426(5) | 0.5050(10) | 0.2072(6) | 0.0271(10) |
| H5 | 0.4621(9) | 0.9609(14) | -0.1498(8) | 0.0441(19) |
| H6 | 0.3194(9) | 0.898(3) | -0.2233(11) | 0.070(4) |
| H7 | 0.4391(14) | 0.7341(16) | -0.2313(10) | 0.065(4) |
| H8 | 0.0720(5) | 0.9843(8) | -0.0673(5) | 0.0238(9) |

140K

| Atom | X/a | Y/b | Z/c | Ueq (Å2) |
| --- | --- | --- | --- | --- |
| C1 | 0.1538(3) | 0.5615(6) | 0.0669(3) | 0.0124(6) |
| C2 | 0.2472(3) | 0.4830(5) | 0.0077(3) | 0.0123(6) |
| C3 | 0.3001(4) | 0.2986(6) | 0.0403(4) | 0.0181(7) |
| C4 | 0.2607(4) | 0.1873(6) | 0.1344(4) | 0.0199(8) |
| C5 | 0.1692(4) | 0.2619(6) | 0.1948(4) | 0.0169(7) |
| C6 | 0.1154(3) | 0.4470(6) | 0.1610(4) | 0.0142(6) |
| C7 | 0.0902(3) | 0.7555(6) | 0.0373(3) | 0.0130(6) |
| C8 | 0.3670(3) | 0.7371(6) | -0.0636(3) | 0.0151(6) |
| C9 | 0.3986(4) | 0.8397(8) | -0.1732(4) | 0.0232(8) |
| O1 | 0.1225(4) | 0.8587(7) | -0.0531(4) | 0.0183(8) |
| O2 | 0.0101(4) | 0.8133(7) | 0.0955(4) | 0.0194(9) |
| O3 | 0.2878(4) | 0.5826(6) | -0.0894(4) | 0.0140(7) |
| O4 | 0.4042(5) | 0.7813(8) | 0.0372(4) | 0.0234(10) |
| H1 | 0.3728(10) | 0.2423(16) | -0.0081(11) | 0.039(2) |
| H2 | 0.3022(11) | 0.0440(15) | 0.1611(11) | 0.039(2) |
| H3 | 0.1387(10) | 0.1777(16) | 0.2711(10) | 0.035(2) |
| H4 | 0.0417(8) | 0.5045(15) | 0.2069(9) | 0.0293(18) |
| H5 | 0.4621(13) | 0.959(2) | -0.1507(13) | 0.055(4) |
| H6 | 0.3195(15) | 0.891(4) | -0.2244(18) | 0.089(8) |
| H7 | 0.435(2) | 0.733(2) | -0.2327(17) | 0.083(7) |
| H8 | 0.0717(9) | 0.9844(14) | -0.0659(8) | 0.0282(17) |

180K

| Atom | X/a | Y/b | Z/c | Ueq (Å2) |
| --- | --- | --- | --- | --- |
| C1 | 0.1537(4) | 0.5621(7) | 0.0669(4) | 0.0184(8) |
| C2 | 0.2469(4) | 0.4843(6) | 0.0078(4) | 0.0170(8) |
| C3 | 0.3000(4) | 0.3002(7) | 0.0405(5) | 0.0248(10) |
| C4 | 0.2609(5) | 0.1885(7) | 0.1348(5) | 0.0258(10) |
| C5 | 0.1690(5) | 0.2637(8) | 0.1944(5) | 0.0243(9) |
| C6 | 0.1161(4) | 0.4475(7) | 0.1610(4) | 0.0195(8) |
| C7 | 0.0901(4) | 0.7550(7) | 0.0371(4) | 0.0175(8) |
| C8 | 0.3666(4) | 0.7380(7) | -0.0633(4) | 0.0210(9) |
| C9 | 0.3979(5) | 0.8399(10) | -0.1734(5) | 0.0310(12) |
| O1 | 0.1227(5) | 0.8586(9) | -0.0528(6) | 0.0263(12) |
| O2 | 0.0106(6) | 0.8127(9) | 0.0957(5) | 0.0271(12) |
| O3 | 0.2871(5) | 0.5836(8) | -0.0896(5) | 0.0208(10) |
| O4 | 0.4036(6) | 0.7813(10) | 0.0367(6) | 0.0323(14) |
| H1 | 0.3721(11) | 0.2451(19) | -0.0089(13) | 0.047(3) |
| H2 | 0.3036(13) | 0.0459(17) | 0.1607(12) | 0.045(3) |
| H3 | 0.1389(12) | 0.1770(19) | 0.2702(12) | 0.044(3) |
| H4 | 0.0415(10) | 0.5074(19) | 0.2061(12) | 0.041(3) |
| H5 | 0.4618(16) | 0.960(3) | -0.1496(14) | 0.067(5) |
| H6 | 0.3215(16) | 0.897(5) | -0.221(2) | 0.115(11) |
| H7 | 0.432(3) | 0.735(3) | -0.233(2) | 0.100(9) |
| H8 | 0.0710(10) | 0.9832(17) | -0.0664(11) | 0.037(2) |

220K

| Atom | X/a | Y/b | Z/c | Ueq (Å2) |
| --- | --- | --- | --- | --- |
| C1 | 0.1543(5) | 0.5643(10) | 0.0670(6) | 0.0260(12) |
| C2 | 0.2466(5) | 0.4854(9) | 0.0088(5) | 0.0236(12) |
| C3 | 0.2991(6) | 0.3017(11) | 0.0412(7) | 0.0330(14) |
| C4 | 0.2610(6) | 0.1916(11) | 0.1347(6) | 0.0326(14) |
| C5 | 0.1699(6) | 0.2647(11) | 0.1940(6) | 0.0316(14) |
| C6 | 0.1170(5) | 0.4484(9) | 0.1601(6) | 0.0267(13) |
| C7 | 0.0903(5) | 0.7569(9) | 0.0378(5) | 0.0228(11) |
| C8 | 0.3660(5) | 0.7370(10) | -0.0641(5) | 0.0271(12) |
| C9 | 0.3979(7) | 0.8381(13) | -0.1743(6) | 0.0375(17) |
| O1 | 0.1217(7) | 0.8591(13) | -0.0525(8) | 0.0344(17) |
| O2 | 0.0093(7) | 0.8126(13) | 0.0958(7) | 0.0370(18) |
| O3 | 0.2865(6) | 0.5847(11) | -0.0888(6) | 0.0243(14) |
| O4 | 0.4037(8) | 0.7828(14) | 0.0366(7) | 0.041(2) |
| H1 | 0.3712(16) | 0.246(3) | -0.0100(18) | 0.061(4) |
| H2 | 0.3033(17) | 0.047(3) | 0.1592(16) | 0.057(4) |
| H3 | 0.1378(15) | 0.180(3) | 0.2708(15) | 0.056(4) |
| H4 | 0.0412(12) | 0.508(3) | 0.2062(14) | 0.048(4) |
| H5 | 0.465(2) | 0.956(4) | -0.1475(18) | 0.082(7) |
| H6 | 0.321(2) | 0.903(7) | -0.218(3) | 0.134(15) |
| H7 | 0.441(4) | 0.739(4) | -0.230(3) | 0.131(15) |
| H8 | 0.0683(16) | 0.987(3) | -0.0683(15) | 0.054(4) |

300K

| Atom | X/a | Y/b | Z/c | Ueq (Å2) |
| --- | --- | --- | --- | --- |
| C1 | 0.1530(6) | 0.5638(12) | 0.0678(6) | 0.0359(16) |
| C2 | 0.2464(6) | 0.4885(12) | 0.0087(6) | 0.0388(18) |
| C3 | 0.2982(6) | 0.3070(13) | 0.0415(8) | 0.048(2) |
| C4 | 0.2602(7) | 0.1952(14) | 0.1344(8) | 0.050(2) |
| C5 | 0.1693(7) | 0.2697(13) | 0.1918(7) | 0.046(2) |
| C6 | 0.1168(7) | 0.4489(13) | 0.1599(7) | 0.0412(18) |
| C7 | 0.0904(6) | 0.7582(11) | 0.0382(6) | 0.0374(17) |
| C8 | 0.3664(6) | 0.7360(13) | -0.0628(7) | 0.0448(19) |
| C9 | 0.3966(10) | 0.835(2) | -0.1720(10) | 0.063(3) |
| O1 | 0.1200(9) | 0.8626(17) | -0.0507(9) | 0.050(2) |
| O2 | 0.0096(8) | 0.8126(15) | 0.0955(9) | 0.051(2) |
| O3 | 0.2857(8) | 0.5877(15) | -0.0879(7) | 0.042(2) |
| O4 | 0.4018(9) | 0.7794(18) | 0.0354(9) | 0.061(3) |
| H1 | 0.3689(16) | 0.247(3) | -0.013(2) | 0.081(6) |
| H2 | 0.3028(16) | 0.053(3) | 0.163(2) | 0.074(5) |
| H3 | 0.1396(16) | 0.177(3) | 0.2700(17) | 0.071(5) |
| H4 | 0.0469(19) | 0.508(3) | 0.2061(18) | 0.068(5) |
| H5 | 0.459(2) | 0.955(5) | -0.149(2) | 0.113(10) |
| H6 | 0.324(3) | 0.883(8) | -0.228(3) | 0.17(2) |
| H7 | 0.432(5) | 0.728(6) | -0.230(3) | 0.169(19) |
| H8 | 0.0647(18) | 0.993(4) | -0.0657(17) | 0.075(6) |

**Supplementary Table 2**

**Variable temperature single crystal neutron diffraction study of Acetylsalicylic acid (Aspirin)**

**Anisotropic atomic displacement parameters, Uij (Å2)**

20K

| Atom | U11 | U22 | U33 | U23 | U13 | U12 |
| --- | --- | --- | --- | --- | --- | --- |
| C1 | 0.0037(7) | 0.0034(6) | 0.0048(7) | 0.0009(5) | 0.0008(6) | 0.0009(5) |
| C2 | 0.0032(7) | 0.0039(6) | 0.0043(7) | -0.0006(5) | 0.0019(6) | 0.0008(5) |
| C3 | 0.0040(7) | 0.0039(6) | 0.0068(8) | 0.0009(5) | 0.0010(6) | 0.0018(5) |
| C4 | 0.0064(8) | 0.0037(6) | 0.0068(8) | 0.0016(6) | 0.0004(6) | 0.0011(6) |
| C5 | 0.0059(7) | 0.0045(6) | 0.0062(7) | 0.0017(6) | 0.0016(6) | 0.0012(6) |
| C6 | 0.0041(7) | 0.0021(6) | 0.0055(8) | 0.0007(5) | 0.0007(6) | 0.0012(5) |
| C7 | 0.0039(6) | 0.0027(6) | 0.0030(6) | 0.0004(6) | 0.0002(5) | 0.0015(5) |
| C8 | 0.0040(6) | 0.0049(6) | 0.0034(6) | -0.0001(5) | 0.0000(5) | -0.0012(5) |
| C9 | 0.0080(8) | 0.0095(8) | 0.0036(6) | 0.0013(6) | 0.0004(6) | -0.0020(7) |
| O1 | 0.0044(8) | 0.0054(7) | 0.0067(8) | 0.0022(7) | 0.0034(7) | 0.0019(6) |
| O2 | 0.0075(9) | 0.0060(8) | 0.0056(8) | 0.0015(7) | 0.0032(7) | 0.0038(7) |
| O3 | 0.0033(8) | 0.0036(7) | 0.0034(8) | 0.0004(6) | -0.0003(6) | 0.0000(6) |
| O4 | 0.0077(9) | 0.0073(8) | 0.0043(8) | -0.0006(6) | -0.0006(7) | -0.0033(7) |
| H1 | 0.018(2) | 0.020(2) | 0.025(3) | 0.004(2) | 0.011(2) | 0.007(2) |
| H2 | 0.026(3) | 0.0122(19) | 0.026(3) | 0.0065(19) | 0.007(2) | 0.0081(19) |
| H3 | 0.019(2) | 0.017(2) | 0.017(2) | 0.0046(18) | 0.0058(19) | -0.0011(18) |
| H4 | 0.015(2) | 0.019(2) | 0.024(3) | 0.004(2) | 0.009(2) | 0.0031(18) |
| H5 | 0.032(4) | 0.029(3) | 0.028(4) | -0.001(3) | 0.003(3) | -0.020(3) |
| H6 | 0.025(3) | 0.057(6) | 0.029(4) | 0.025(4) | -0.010(3) | -0.002(4) |
| H7 | 0.062(7) | 0.022(3) | 0.041(5) | -0.004(3) | 0.032(5) | -0.002(4) |
| H8 | 0.017(2) | 0.0112(16) | 0.017(2) | 0.0032(16) | 0.0029(18) | 0.0018(16) |

60K

| Atom | U11 | U22 | U33 | U23 | U13 | U12 |
| --- | --- | --- | --- | --- | --- | --- |
| C1 | 0.0062(9) | 0.0054(8) | 0.0058(9) | 0.0009(7) | 0.0013(7) | 0.0017(7) |
| C2 | 0.0053(9) | 0.0055(7) | 0.0057(9) | -0.0012(7) | 0.0002(7) | 0.0007(7) |
| C3 | 0.0085(10) | 0.0074(9) | 0.0095(10) | 0.0003(8) | 0.0016(8) | 0.0036(8) |
| C4 | 0.0102(11) | 0.0050(8) | 0.0123(11) | 0.0020(7) | 0.0021(9) | 0.0006(7) |
| C5 | 0.0085(9) | 0.0075(8) | 0.0096(9) | 0.0020(8) | 0.0017(8) | -0.0003(8) |
| C6 | 0.0063(9) | 0.0062(8) | 0.0079(10) | 0.0009(7) | 0.0021(8) | 0.0007(8) |
| C7 | 0.0075(9) | 0.0050(8) | 0.0054(8) | 0.0007(7) | 0.0017(7) | 0.0017(8) |
| C8 | 0.0059(9) | 0.0077(8) | 0.0071(8) | -0.0003(7) | 0.0018(7) | -0.0008(7) |
| C9 | 0.0095(11) | 0.0156(11) | 0.0064(9) | 0.0023(8) | 0.0015(8) | -0.0043(9) |
| O1 | 0.0078(11) | 0.0071(10) | 0.0103(12) | 0.0029(9) | 0.0038(9) | 0.0024(8) |
| O2 | 0.0103(12) | 0.0094(10) | 0.0086(11) | 0.0024(9) | 0.0042(9) | 0.0041(9) |
| O3 | 0.0060(10) | 0.0080(10) | 0.0058(10) | 0.0003(8) | 0.0005(8) | -0.0008(8) |
| O4 | 0.0124(13) | 0.0130(12) | 0.0063(10) | -0.0012(9) | -0.0009(9) | -0.0051(10) |
| H1 | 0.024(3) | 0.022(3) | 0.034(4) | 0.005(3) | 0.019(3) | 0.010(3) |
| H2 | 0.033(4) | 0.013(2) | 0.031(4) | 0.005(2) | 0.007(3) | 0.009(2) |
| H3 | 0.026(3) | 0.021(3) | 0.021(3) | 0.006(2) | 0.007(3) | 0.001(2) |
| H4 | 0.019(3) | 0.019(2) | 0.026(3) | 0.003(2) | 0.008(2) | 0.002(2) |
| H5 | 0.038(5) | 0.036(4) | 0.029(4) | 0.002(3) | 0.005(3) | -0.024(4) |
| H6 | 0.027(4) | 0.079(9) | 0.042(6) | 0.034(6) | -0.012(4) | -0.005(5) |
| H7 | 0.076(9) | 0.030(4) | 0.041(6) | -0.011(4) | 0.036(6) | -0.006(5) |
| H8 | 0.022(3) | 0.0110(19) | 0.023(3) | 0.0017(19) | 0.004(2) | 0.0061(19) |

100K

| Atom | U11 | U22 | U33 | U23 | U13 | U12 |
| --- | --- | --- | --- | --- | --- | --- |
| C1 | 0.0091(7) | 0.0091(6) | 0.0095(7) | 0.0010(5) | 0.0011(5) | 0.0010(5) |
| C2 | 0.0085(6) | 0.0096(6) | 0.0111(7) | -0.0008(6) | 0.0017(5) | 0.0010(5) |
| C3 | 0.0119(8) | 0.0099(7) | 0.0158(8) | -0.0003(6) | 0.0026(6) | 0.0028(6) |
| C4 | 0.0150(9) | 0.0099(7) | 0.0179(9) | 0.0016(6) | 0.0023(7) | 0.0022(6) |
| C5 | 0.0129(8) | 0.0117(7) | 0.0134(7) | 0.0036(6) | 0.0019(6) | 0.0020(6) |
| C6 | 0.0097(7) | 0.0111(7) | 0.0111(7) | 0.0015(6) | 0.0018(6) | 0.0010(6) |
| C7 | 0.0093(6) | 0.0089(6) | 0.0092(6) | 0.0006(5) | 0.0012(5) | 0.0013(5) |
| C8 | 0.0097(6) | 0.0128(7) | 0.0092(6) | -0.0006(6) | 0.0016(5) | -0.0015(6) |
| C9 | 0.0163(9) | 0.0223(10) | 0.0124(8) | 0.0031(7) | 0.0014(7) | -0.0049(8) |
| O1 | 0.0131(9) | 0.0129(8) | 0.0158(9) | 0.0047(7) | 0.0050(7) | 0.0034(7) |
| O2 | 0.0161(10) | 0.0147(9) | 0.0142(9) | 0.0037(7) | 0.0072(8) | 0.0060(8) |
| O3 | 0.0118(8) | 0.0123(8) | 0.0078(7) | -0.0014(6) | 0.0015(6) | -0.0010(7) |
| O4 | 0.0188(11) | 0.0212(11) | 0.0114(9) | -0.0022(8) | 0.0008(8) | -0.0085(9) |
| H1 | 0.029(3) | 0.028(2) | 0.035(3) | 0.004(2) | 0.015(2) | 0.011(2) |
| H2 | 0.038(3) | 0.0166(19) | 0.040(3) | 0.007(2) | 0.006(3) | 0.0086(19) |
| H3 | 0.031(3) | 0.026(2) | 0.032(3) | 0.010(2) | 0.011(2) | 0.003(2) |
| H4 | 0.023(2) | 0.029(2) | 0.032(3) | 0.005(2) | 0.013(2) | 0.0067(19) |
| H5 | 0.053(5) | 0.042(4) | 0.039(4) | 0.001(3) | 0.009(3) | -0.027(4) |
| H6 | 0.032(4) | 0.117(10) | 0.058(6) | 0.060(7) | -0.008(4) | -0.005(5) |
| H7 | 0.113(10) | 0.043(4) | 0.048(5) | -0.016(4) | 0.051(6) | -0.014(5) |
| H8 | 0.026(2) | 0.0193(17) | 0.027(2) | 0.0069(17) | 0.0069(18) | 0.0064(16) |

140K

| Atom | U11 | U22 | U33 | U23 | U13 | U12 |
| --- | --- | --- | --- | --- | --- | --- |
| C1 | 0.0125(14) | 0.0109(12) | 0.0138(15) | 0.0014(11) | 0.0004(12) | 0.0012(11) |
| C2 | 0.0115(14) | 0.0113(13) | 0.0143(14) | -0.0016(11) | 0.0017(12) | 0.0017(10) |
| C3 | 0.0175(17) | 0.0143(14) | 0.0228(18) | -0.0003(14) | 0.0042(14) | 0.0043(12) |
| C4 | 0.0202(18) | 0.0130(15) | 0.026(2) | 0.0009(13) | 0.0027(16) | 0.0027(13) |
| C5 | 0.0162(16) | 0.0177(15) | 0.0167(16) | 0.0053(13) | 0.0001(12) | -0.0008(13) |
| C6 | 0.0138(15) | 0.0124(13) | 0.0167(16) | 0.0011(12) | 0.0026(13) | 0.0019(12) |
| C7 | 0.0140(14) | 0.0136(14) | 0.0119(14) | 0.0001(12) | 0.0043(11) | 0.0006(12) |
| C8 | 0.0135(14) | 0.0181(14) | 0.0139(14) | -0.0006(13) | 0.0025(11) | -0.0018(12) |
| C9 | 0.0191(18) | 0.032(2) | 0.0181(18) | 0.0046(16) | 0.0007(14) | -0.0059(16) |
| O1 | 0.0174(19) | 0.0168(17) | 0.022(2) | 0.0069(15) | 0.0071(16) | 0.0060(14) |
| O2 | 0.021(2) | 0.0195(18) | 0.0197(19) | 0.0049(15) | 0.0091(17) | 0.0092(16) |
| O3 | 0.0151(18) | 0.0151(16) | 0.0119(17) | -0.0018(13) | 0.0020(14) | -0.0013(13) |
| O4 | 0.027(2) | 0.028(2) | 0.0156(18) | -0.0018(17) | 0.0022(16) | -0.0109(18) |
| H1 | 0.038(5) | 0.031(4) | 0.053(6) | 0.005(4) | 0.027(5) | 0.013(4) |
| H2 | 0.044(6) | 0.022(4) | 0.051(6) | 0.009(4) | 0.007(5) | 0.013(4) |
| H3 | 0.040(5) | 0.030(4) | 0.036(5) | 0.011(4) | 0.012(4) | 0.002(4) |
| H4 | 0.024(4) | 0.034(4) | 0.032(4) | 0.005(3) | 0.012(3) | 0.007(3) |
| H5 | 0.061(8) | 0.052(7) | 0.050(7) | 0.010(6) | 0.001(6) | -0.040(6) |
| H6 | 0.046(8) | 0.141(19) | 0.075(11) | 0.071(13) | -0.018(7) | -0.010(10) |
| H7 | 0.147(19) | 0.045(7) | 0.070(10) | -0.011(7) | 0.074(12) | -0.014(9) |
| H8 | 0.035(4) | 0.025(4) | 0.026(4) | 0.007(3) | 0.006(3) | 0.011(3) |

180K

| Atom | U11 | U22 | U33 | U23 | U13 | U12 |
| --- | --- | --- | --- | --- | --- | --- |
| C1 | 0.019(2) | 0.0180(17) | 0.018(2) | 0.0020(15) | 0.0007(16) | 0.0008(15) |
| C2 | 0.0173(19) | 0.0169(17) | 0.0169(19) | -0.0018(15) | 0.0024(15) | 0.0007(14) |
| C3 | 0.021(2) | 0.019(2) | 0.034(3) | -0.0018(18) | 0.0066(19) | 0.0062(16) |
| C4 | 0.028(2) | 0.017(2) | 0.032(3) | 0.0023(18) | 0.004(2) | 0.0063(17) |
| C5 | 0.024(2) | 0.023(2) | 0.025(2) | 0.0064(18) | 0.0016(17) | 0.0009(17) |
| C6 | 0.0171(19) | 0.0203(18) | 0.021(2) | 0.0019(16) | 0.0031(16) | 0.0013(15) |
| C7 | 0.0173(18) | 0.0191(19) | 0.0164(19) | 0.0017(17) | 0.0034(14) | 0.0025(16) |
| C8 | 0.0167(18) | 0.027(2) | 0.020(2) | -0.0010(18) | 0.0036(16) | -0.0015(16) |
| C9 | 0.025(2) | 0.045(3) | 0.023(2) | 0.002(2) | 0.0024(19) | -0.012(2) |
| O1 | 0.027(3) | 0.020(2) | 0.033(3) | 0.008(2) | 0.012(2) | 0.009(2) |
| O2 | 0.033(3) | 0.027(3) | 0.023(3) | 0.006(2) | 0.009(2) | 0.013(2) |
| O3 | 0.021(2) | 0.023(2) | 0.019(2) | -0.0027(19) | 0.0042(19) | -0.0032(19) |
| O4 | 0.036(3) | 0.035(3) | 0.025(3) | -0.002(2) | 0.002(2) | -0.018(3) |
| H1 | 0.045(6) | 0.037(5) | 0.067(8) | 0.003(5) | 0.033(6) | 0.009(5) |
| H2 | 0.061(8) | 0.025(5) | 0.049(7) | 0.009(5) | 0.002(6) | 0.013(5) |
| H3 | 0.054(7) | 0.034(5) | 0.045(6) | 0.020(5) | 0.005(5) | -0.003(5) |
| H4 | 0.030(5) | 0.041(6) | 0.054(7) | 0.007(5) | 0.017(5) | 0.006(4) |
| H5 | 0.075(10) | 0.080(10) | 0.047(8) | 0.008(7) | 0.007(7) | -0.049(9) |
| H6 | 0.046(9) | 0.20(3) | 0.091(15) | 0.100(19) | -0.019(9) | -0.007(12) |
| H7 | 0.18(2) | 0.057(10) | 0.080(13) | -0.019(9) | 0.077(15) | -0.023(12) |
| H8 | 0.037(5) | 0.033(5) | 0.042(6) | 0.011(4) | 0.010(4) | 0.008(4) |

220K

| Atom | U11 | U22 | U33 | U23 | U13 | U12 |
| --- | --- | --- | --- | --- | --- | --- |
| C1 | 0.025(3) | 0.027(3) | 0.026(3) | 0.003(2) | 0.000(2) | 0.002(2) |
| C2 | 0.020(3) | 0.025(3) | 0.025(3) | -0.005(2) | -0.002(2) | 0.001(2) |
| C3 | 0.032(3) | 0.029(3) | 0.039(4) | -0.001(3) | 0.008(3) | 0.010(3) |
| C4 | 0.035(3) | 0.025(3) | 0.038(4) | 0.005(3) | 0.002(3) | 0.008(3) |
| C5 | 0.030(3) | 0.030(3) | 0.035(3) | 0.008(3) | 0.004(2) | 0.003(3) |
| C6 | 0.024(3) | 0.024(3) | 0.033(3) | 0.003(2) | 0.007(2) | 0.002(2) |
| C7 | 0.024(2) | 0.027(3) | 0.018(2) | 0.002(2) | 0.0061(19) | 0.005(2) |
| C8 | 0.023(3) | 0.036(3) | 0.023(2) | -0.002(3) | 0.006(2) | -0.003(2) |
| C9 | 0.034(3) | 0.050(4) | 0.029(3) | 0.006(3) | 0.003(3) | -0.009(3) |
| O1 | 0.034(4) | 0.029(4) | 0.042(4) | 0.011(3) | 0.014(3) | 0.012(3) |
| O2 | 0.042(4) | 0.035(4) | 0.036(4) | 0.012(3) | 0.016(3) | 0.024(3) |
| O3 | 0.026(3) | 0.030(3) | 0.017(3) | -0.002(2) | -0.001(3) | -0.004(3) |
| O4 | 0.048(5) | 0.047(5) | 0.029(4) | -0.004(4) | 0.004(3) | -0.019(4) |
| H1 | 0.057(9) | 0.046(8) | 0.087(11) | 0.006(8) | 0.040(9) | 0.022(7) |
| H2 | 0.069(10) | 0.045(8) | 0.057(10) | 0.010(7) | 0.002(8) | 0.025(8) |
| H3 | 0.060(9) | 0.051(9) | 0.054(9) | 0.026(7) | -0.002(7) | -0.013(8) |
| H4 | 0.031(6) | 0.065(9) | 0.050(8) | 0.013(7) | 0.019(6) | 0.022(6) |
| H5 | 0.106(16) | 0.092(14) | 0.050(9) | 0.006(10) | 0.019(10) | -0.058(13) |
| H6 | 0.063(13) | 0.22(4) | 0.11(2) | 0.10(2) | -0.015(13) | 0.025(18) |
| H7 | 0.26(4) | 0.055(12) | 0.096(19) | -0.017(13) | 0.10(2) | -0.006(18) |
| H8 | 0.055(8) | 0.053(9) | 0.053(9) | 0.021(7) | 0.009(7) | 0.005(7) |

300K

| Atom | U11 | U22 | U33 | U23 | U13 | U12 |
| --- | --- | --- | --- | --- | --- | --- |
| C1 | 0.037(3) | 0.035(4) | 0.035(4) | -0.004(3) | 0.001(3) | 0.003(3) |
| C2 | 0.036(4) | 0.043(4) | 0.037(4) | -0.005(3) | -0.002(3) | 0.002(3) |
| C3 | 0.039(4) | 0.043(5) | 0.065(5) | -0.006(4) | 0.013(4) | 0.008(4) |
| C4 | 0.053(4) | 0.039(5) | 0.062(5) | 0.004(4) | 0.015(4) | 0.004(4) |
| C5 | 0.049(4) | 0.043(5) | 0.048(4) | 0.015(4) | 0.010(3) | 0.003(4) |
| C6 | 0.039(4) | 0.045(4) | 0.041(4) | 0.010(4) | 0.007(4) | -0.002(4) |
| C7 | 0.037(3) | 0.035(4) | 0.039(4) | 0.002(4) | 0.001(3) | 0.000(3) |
| C8 | 0.040(4) | 0.053(5) | 0.042(4) | -0.001(4) | 0.003(3) | 0.001(4) |
| C9 | 0.059(6) | 0.075(7) | 0.053(6) | 0.009(5) | 0.004(5) | -0.017(6) |
| O1 | 0.055(5) | 0.047(5) | 0.051(6) | 0.016(5) | 0.026(5) | 0.014(5) |
| O2 | 0.057(5) | 0.045(5) | 0.053(5) | 0.015(4) | 0.012(5) | 0.028(5) |
| O3 | 0.044(4) | 0.051(5) | 0.032(4) | -0.005(4) | 0.006(4) | -0.001(4) |
| O4 | 0.067(6) | 0.067(7) | 0.048(5) | -0.003(5) | -0.003(5) | -0.022(6) |
| H1 | 0.070(11) | 0.081(13) | 0.098(13) | -0.010(12) | 0.037(11) | 0.042(11) |
| H2 | 0.066(11) | 0.051(10) | 0.104(16) | 0.009(10) | 0.003(10) | 0.004(9) |
| H3 | 0.083(12) | 0.062(10) | 0.073(11) | 0.042(9) | 0.024(10) | 0.005(9) |
| H4 | 0.079(11) | 0.049(9) | 0.076(12) | 0.016(9) | 0.012(11) | 0.011(9) |
| H5 | 0.107(16) | 0.14(2) | 0.093(16) | -0.008(16) | 0.020(14) | -0.080(19) |
| H6 | 0.11(2) | 0.24(5) | 0.15(3) | 0.12(3) | -0.06(2) | -0.07(3) |
| H7 | 0.31(6) | 0.12(3) | 0.09(2) | 0.00(2) | 0.11(3) | -0.05(3) |
| H8 | 0.069(11) | 0.100(16) | 0.060(11) | 0.015(11) | 0.019(9) | -0.007(12) |

**Supplementary Table 3**

**Variable temperature single crystal neutron diffraction study of Acetylsalicylic acid (Aspirin)**

**Bond lengths (Å)**

|  | **20K** | **60K** | **100K** | **140K** | **180K** | **220K** | **300K** |
| --- | --- | --- | --- | --- | --- | --- | --- |
| C1-C6 | 1.403(3) | 1.399(4) | 1.399(3) | 1.400(5) | 1.401(6) | 1.392(8) | 1.396(11) |
| C1-C2 | 1.404(3) | 1.400(4) | 1.402(3) | 1.403(5) | 1.405(7) | 1.400(9) | 1.409(11) |
| C1-C7 | 1.488(3) | 1.489(4) | 1.487(3) | 1.481(5) | 1.477(6) | 1.480(9) | 1.492(10) |
| C2-C3 | 1.385(4) | 1.387(4) | 1.384(3) | 1.381(5) | 1.382(6) | 1.380(9) | 1.373(11) |
| C2-O3 | 1.387(3) | 1.392(4) | 1.390(3) | 1.391(6) | 1.394(7) | 1.397(9) | 1.399(12) |
| C3-C4 | 1.390(4) | 1.392(4) | 1.391(3) | 1.396(6) | 1.402(8) | 1.387(11) | 1.401(13) |
| C3-H1 | 1.100(6) | 1.083(7) | 1.082(6) | 1.093(10) | 1.096(12) | 1.111(16) | 1.141(19) |
| C4-C5 | 1.394(3) | 1.394(4) | 1.392(3) | 1.382(6) | 1.386(8) | 1.375(10) | 1.373(13) |
| C4-H2 | 1.084(6) | 1.084(7) | 1.075(6) | 1.078(10) | 1.080(12) | 1.085(17) | 1.09(2) |
| C5-C6 | 1.386(3) | 1.391(4) | 1.384(3) | 1.392(6) | 1.382(7) | 1.385(9) | 1.359(12) |
| C5-H3 | 1.096(7) | 1.086(8) | 1.091(6) | 1.106(10) | 1.110(13) | 1.123(17) | 1.165(19) |
| C6-H4 | 1.090(7) | 1.091(8) | 1.085(6) | 1.090(9) | 1.101(12) | 1.121(14) | 1.07(3) |
| C7-O2 | 1.223(3) | 1.224(4) | 1.222(3) | 1.228(5) | 1.229(7) | 1.238(9) | 1.237(12) |
| C7-O1 | 1.309(3) | 1.309(4) | 1.308(3) | 1.305(6) | 1.307(7) | 1.303(10) | 1.303(12) |
| C8-O4 | 1.202(3) | 1.204(4) | 1.202(3) | 1.206(6) | 1.199(7) | 1.214(10) | 1.195(12) |
| C8-O3 | 1.365(3) | 1.361(4) | 1.358(3) | 1.362(6) | 1.367(7) | 1.357(9) | 1.355(12) |
| C8-C9 | 1.495(3) | 1.490(4) | 1.489(3) | 1.482(6) | 1.487(7) | 1.490(9) | 1.485(13) |
| C9-H5 | 1.096(8) | 1.090(9) | 1.071(8) | 1.074(12) | 1.082(16) | 1.10(2) | 1.08(3) |
| C9-H6 | 1.087(9) | 1.084(11) | 1.071(9) | 1.067(16) | 1.042(18) | 1.05(3) | 1.04(3) |
| C9-H7 | 1.091(9) | 1.085(10) | 1.082(10) | 1.080(16) | 1.07(2) | 1.06(3) | 1.07(5) |
| O1-H8 | 1.017(6) | 1.015(7) | 1.009(6) | 1.006(10) | 1.008(12) | 1.04(2) | 1.07(3) |

**Supplementary Table 4**

**Variable temperature single crystal neutron diffraction study of Acetylsalicylic acid (Aspirin)**

**Bond Angles (º)**

|  | **20K** | **60K** | **100K** | **140K** | **180K** | **220K** | **300K** |
| --- | --- | --- | --- | --- | --- | --- | --- |
| C6-C1-C2 | 118.0(2) | 118.0(2) | 117.98(18) | 117.9(3) | 117.8(4) | 116.9(6) | 117.9(7) |
| C6-C1-C7 | 125.4(2) | 125.6(2) | 116.70(18) | 125.3(3) | 125.2(4) | 126.0(5) | 118.0(7) |
| C2-C1-C7 | 116.58(19) | 116.5(2) | 125.32(18) | 116.8(3) | 117.0(4) | 117.0(5) | 124.1(7) |
| C3-C2-O3 | 117.2(2) | 117.1(3) | 117.1(2) | 116.9(4) | 116.9(4) | 116.9(6) | 117.5(7) |
| C3-C2-C1 | 121.7(2) | 121.2(3) | 120.99(19) | 121.3(3) | 121.2(4) | 121.7(6) | 120.1(7) |
| O3-C2-C1 | 121.0(2) | 121.7(3) | 121.8(2) | 121.7(3) | 121.8(4) | 121.4(6) | 122.2(7) |
| C4-C3-C2 | 120.1(2) | 119.9(3) | 120.0(2) | 119.8(4) | 119.9(4) | 120.0(6) | 120.7(8) |
| C4-C3-H1 | 118.9(4) | 118.2(5) | 121.1(4) | 119.2(7) | 118.5(9) | 122.1(11) | 117.6(14) |
| C2-C3-H1 | 121.0(4) | 121.9(5) | 118.9(4) | 121.0(7) | 121.6(8) | 117.9(11) | 121.6(14) |
| C3-C4-C5 | 119.9(2) | 120.1(3) | 120.0(2) | 120.0(4) | 119.6(4) | 119.9(6) | 118.8(8) |
| C3-C4-H2 | 119.7(4) | 120.4(5) | 119.5(5) | 119.7(8) | 120.9(9) | 121.0(12) | 120.0(14) |
| C5-C4-H2 | 120.4(4) | 119.5(5) | 120.5(5) | 120.3(7) | 119.5(9) | 119.1(12) | 121.2(14) |
| C6-C5-C4 | 119.8(2) | 119.4(3) | 119.6(2) | 120.0(4) | 120.2(5) | 119.7(6) | 121.1(8) |
| C6-C5-H3 | 119.7(4) | 120.0(5) | 120.0(4) | 120.9(7) | 120.0(9) | 121.6(12) | 120.7(12) |
| C4-C5-H3 | 120.4(4) | 120.6(5) | 120.4(4) | 119.1(7) | 119.8(8) | 118.7(11) | 118.2(12) |
| C5-C6-C1 | 121.2(2) | 121.4(3) | 121.4(2) | 120.9(4) | 121.2(4) | 121.8(6) | 121.4(8) |
| C5-C6-H4 | 120.3(4) | 119.7(5) | 120.2(4) | 120.3(6) | 121.1(8) | 120.4(10) | 121.0(11) |
| C1-C6-H4 | 118.5(4) | 118.9(4) | 118.3(4) | 118.8(6) | 117.7(8) | 117.7(10) | 117.6(11) |
| O2-C7-O1 | 123.0(2) | 122.9(3) | 122.7(2) | 122.4(4) | 122.6(5) | 122.8(7) | 121.8(9) |
| O2-C7-C1 | 120.8(2) | 120.8(3) | 120.8(2) | 120.7(4) | 120.4(4) | 120.6(6) | 119.6(7) |
| O1-C7-C1 | 116.2(2) | 116.3(3) | 116.5(2) | 117.0(4) | 116.9(4) | 116.7(6) | 118.6(8) |
| O4-C8-O3 | 122.2(2) | 122.5(3) | 122.5(2) | 122.6(4) | 122.6(5) | 122.6(6) | 122.3(9) |
| O4-C8-C9 | 126.3(2) | 126.0(3) | 125.9(2) | 125.9(4) | 126.3(5) | 125.7(7) | 127.3(10) |
| O3-C8-C9 | 111.6(2) | 111.5(3) | 111.6(2) | 111.5(4) | 111.1(4) | 111.7(6) | 110.4(8) |
| C8-C9-H5 | 108.7(5) | 108.9(6) | 109.5(5) | 110.2(8) | 109.2(9) | 107.5(12) | 108.5(17) |
| C8-C9-H6 | 109.4(6) | 109.0(7) | 109.3(6) | 109.7(10) | 110.0(12) | 108.6(18) | 114(2) |
| H5-C9-H6 | 111.1(9) | 112.2(11) | 111.9(10) | 113.4(16) | 111(2) | 111(3) | 113(3) |
| C8-C9-H7 | 111.1(6) | 110.4(7) | 110.7(6) | 111.3(10) | 111.7(12) | 113.0(16) | 111(2) |
| H5-C9-H7 | 111.2(9) | 110.6(10) | 108.6(9) | 109.2(15) | 110.4(18) | 104(3) | 111(3) |
| H6-C9-H7 | 105.2(11) | 105.8(13) | 106.8(13) | 103(2) | 104(3) | 112(3) | 98(4) |
| C7-O1-H8 | 109.0(4) | 109.7(5) | 109.8(4) | 109.7(7) | 109.6(8) | 110.4(11) | 110.9(13) |
| C8-O3-C2 | 116.5(2) | 116.4(3) | 116.4(2) | 116.2(4) | 115.8(5) | 116.4(6) | 115.7(7) |
